# Supplementary material for: Three New Sesquiterpenoids from the Algal-Derived Fungus Penicillium chermesinum EN-480
Source: PubMed Central journal article supplement (PMC7230704; doi:10.3390/md18040194), 2020-04-07
Supplement: marinedrugs-18-00194-s001.pdf [file marinedrugs-18-00194-s001.pdf]

## Supplementary Material

### Three New Sesquiterpenoids from the Algal-Derived Fungus *Penicillium chermesinum* EN-480

Xue-Yi Hu <sup>1,2,3</sup>, Xiao-Ming Li <sup>1,2</sup>, Sui-Qun Yang <sup>1,2</sup>, Hui Liu <sup>1</sup>, Ling-Hong Meng <sup>1,2,\*</sup> and Bin-Gui Wang <sup>1,2,4,\*</sup>

<sup>1</sup> Key Laboratory of Experimental Marine Biology, Institute of Oceanology, Chinese Academy of Sciences, Nanhai Road 7, Qingdao 266071, China; E-Mails: huxueyi14@mailsucas.ac.cn (X.-Y.H.); lixmqdio@126.com (X.-M.L.); suiqunyang@163.com (S.-Q.Y.); liuhui1625@163.com (H.L.)

<sup>2</sup> Laboratory of Marine Biology and Biotechnology, Qingdao National Laboratory for Marine Science and Technology, Wenhai Road 1, Qingdao 266237, China

<sup>3</sup> College of Earth Science, University of Chinese Academy of Sciences, Yuquan Road 19A, Beijing 100049, China

<sup>4</sup> Center for Ocean Mega-Science, Chinese Academy of Sciences, Nanhai Road 7, Qingdao 266071, China

\* Correspondence: menglh@ms.qdio.ac.cn (L.-H.M.); Tel: +86-532-8289-8890 (L.-H.M.); wangbg@ms.qdio.ac.cn (B.-G.W.); Tel.: +86-532-8289 8553 (B.-G.W.)

#### Content

Figure S1. HRESI mass spectrum of compound 1.

Figure S2. <sup>1</sup>H NMR (500 MHz, DMSO-*d*<sub>6</sub>) spectrum of compound 1.

Figure S3. <sup>13</sup>C NMR (125 MHz, DMSO-*d*<sub>6</sub>) and DEPT spectra of compound 1.

Figure S4. COSY spectrum of compound 1.

Figure S5. HMBC spectrum of compound 1.

Figure S6. NOESY spectrum of compound 1.

Figure S7. <sup>1</sup>H NMR (500 MHz, DMSO-*d*<sub>6</sub>) spectrum of compound 2.

Figure S8. <sup>13</sup>C NMR (125 MHz, DMSO-*d*<sub>6</sub>) and DEPT spectra of compound 2.

Figure S9. COSY spectrum of compound 2.

Figure S10. HMBC spectrum of compound 2.

Figure S11. NOESY spectrum of compound 2.

Figure S12. <sup>1</sup>H NMR (500 MHz, DMSO-*d*<sub>6</sub>) spectrum of compound 3.

Figure S13. <sup>13</sup>C NMR (125 MHz, DMSO-*d*<sub>6</sub>) and DEPT spectra of compound 3.

Figure S14. COSY spectrum of compound 3.

Figure S15. HMBC spectrum of compound 3.

Figure S16. NOESY spectrum of compound 3.

Figure S17. DP4+ probability Excel sheets of compound 1.

Figure S18. DP4+ probability Excel sheets of compound 2.

Figure S19. DP4+ probability Excel sheets of compound 3.

Figure S1. HRESI mass spectrum of compound 1.

20170915-EN480R-4\_170915092600

9/15/2017 9:44:06 AM

EN480R-4

20170915-EN480R-4\_170915092600 #96 RT: 0.98 AV: 1 SB: 25 0.18-0.44 NL: 1.40E7  
T: FTMS + p-ESI Full ms [150.00-1000.00]

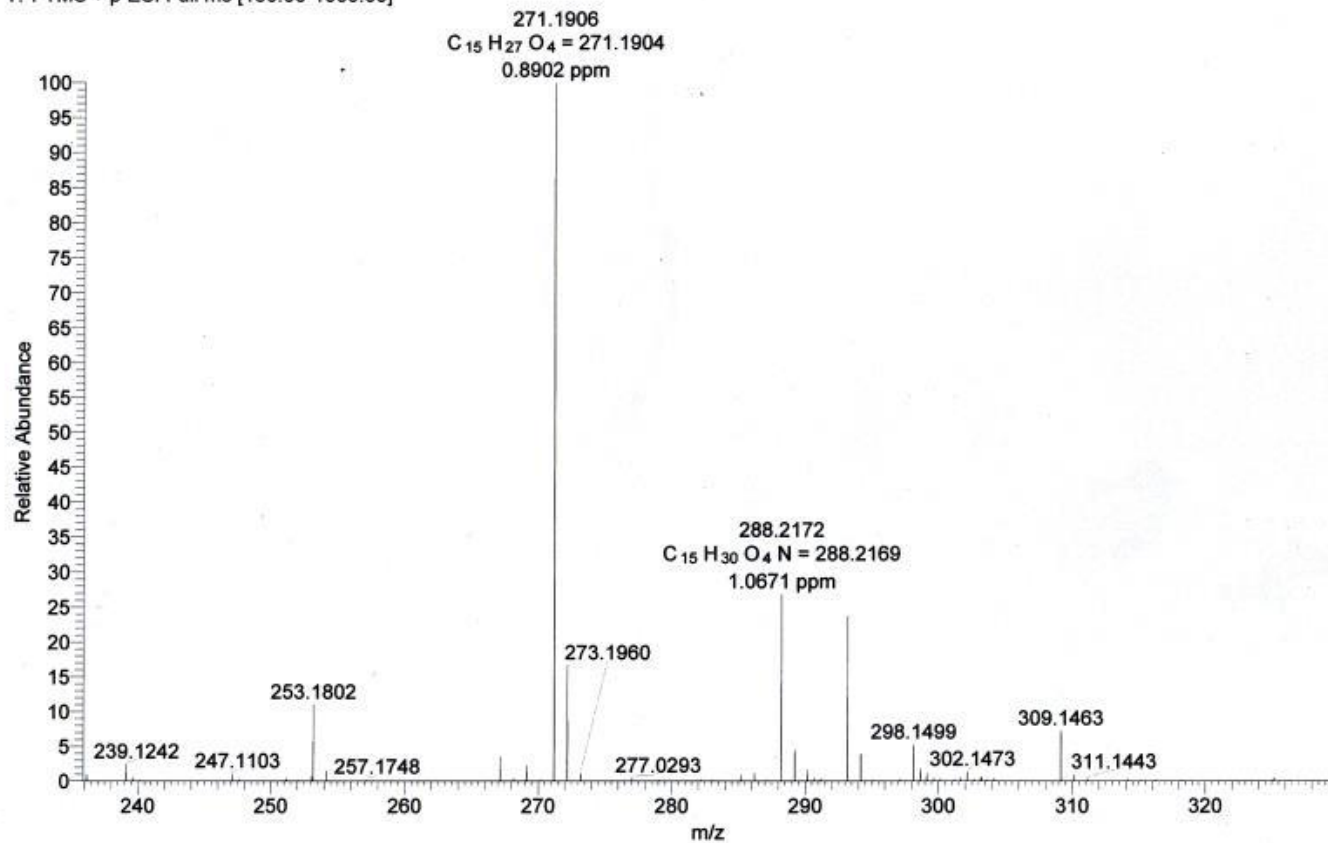

Figure S2. <sup>1</sup>H NMR (500 MHz, DMSO-*d*<sub>6</sub>) spectrum of compound 1.

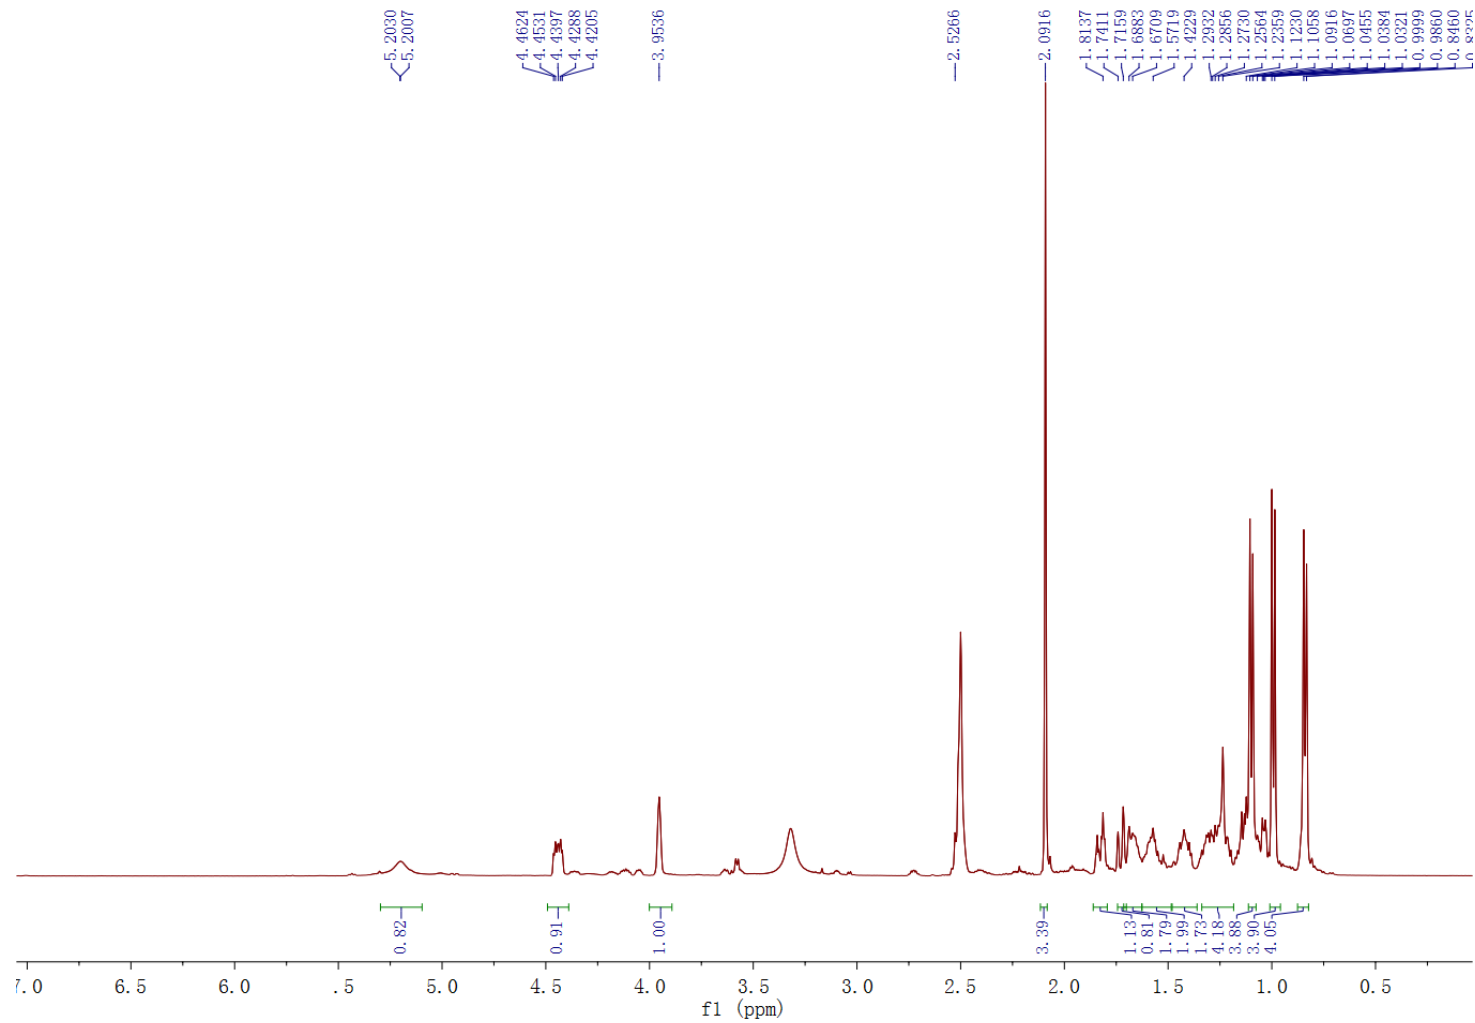

Figure S3.  $^{13}\text{C}$  NMR (125 MHz,  $\text{DMSO-}d_6$ ) and DEPT spectra of compound **1**.

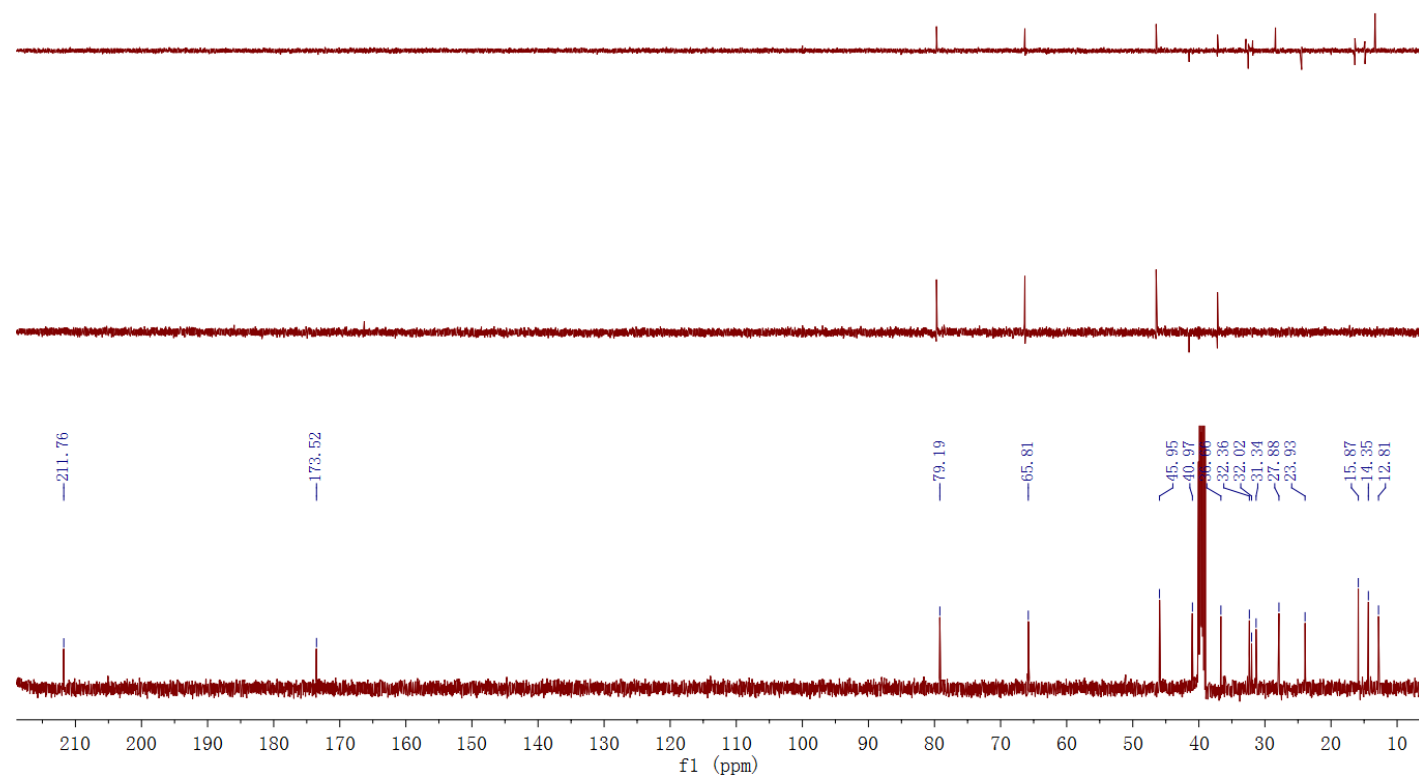

Figure S4. COSY spectrum of compound 1.

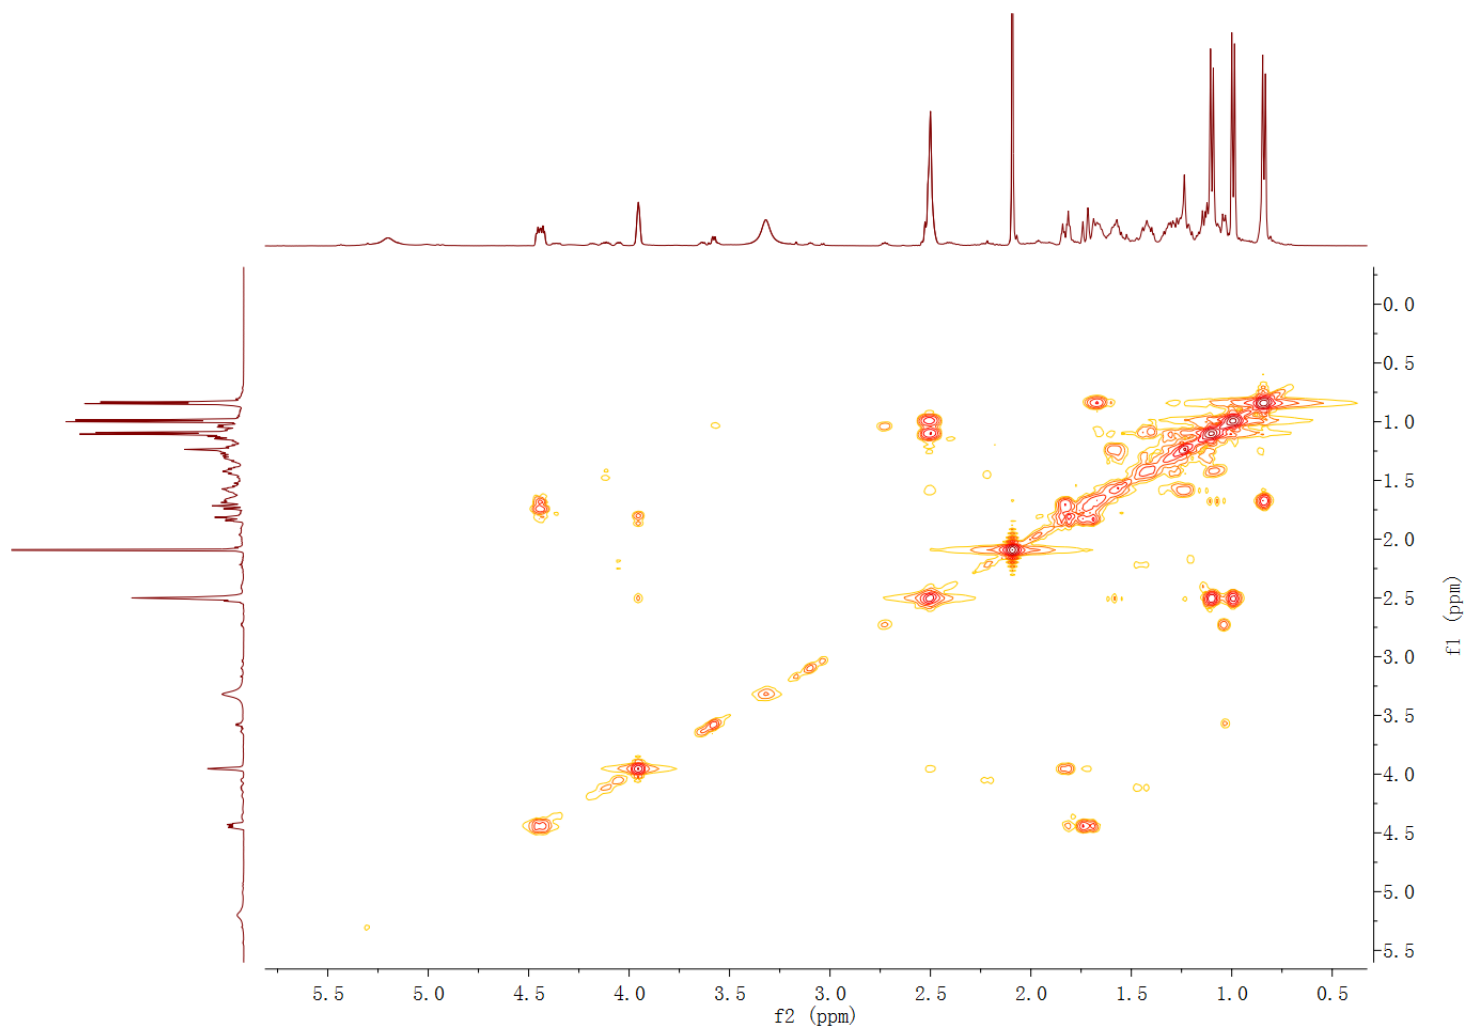

Figure S5. HMBC spectrum of compound 1.

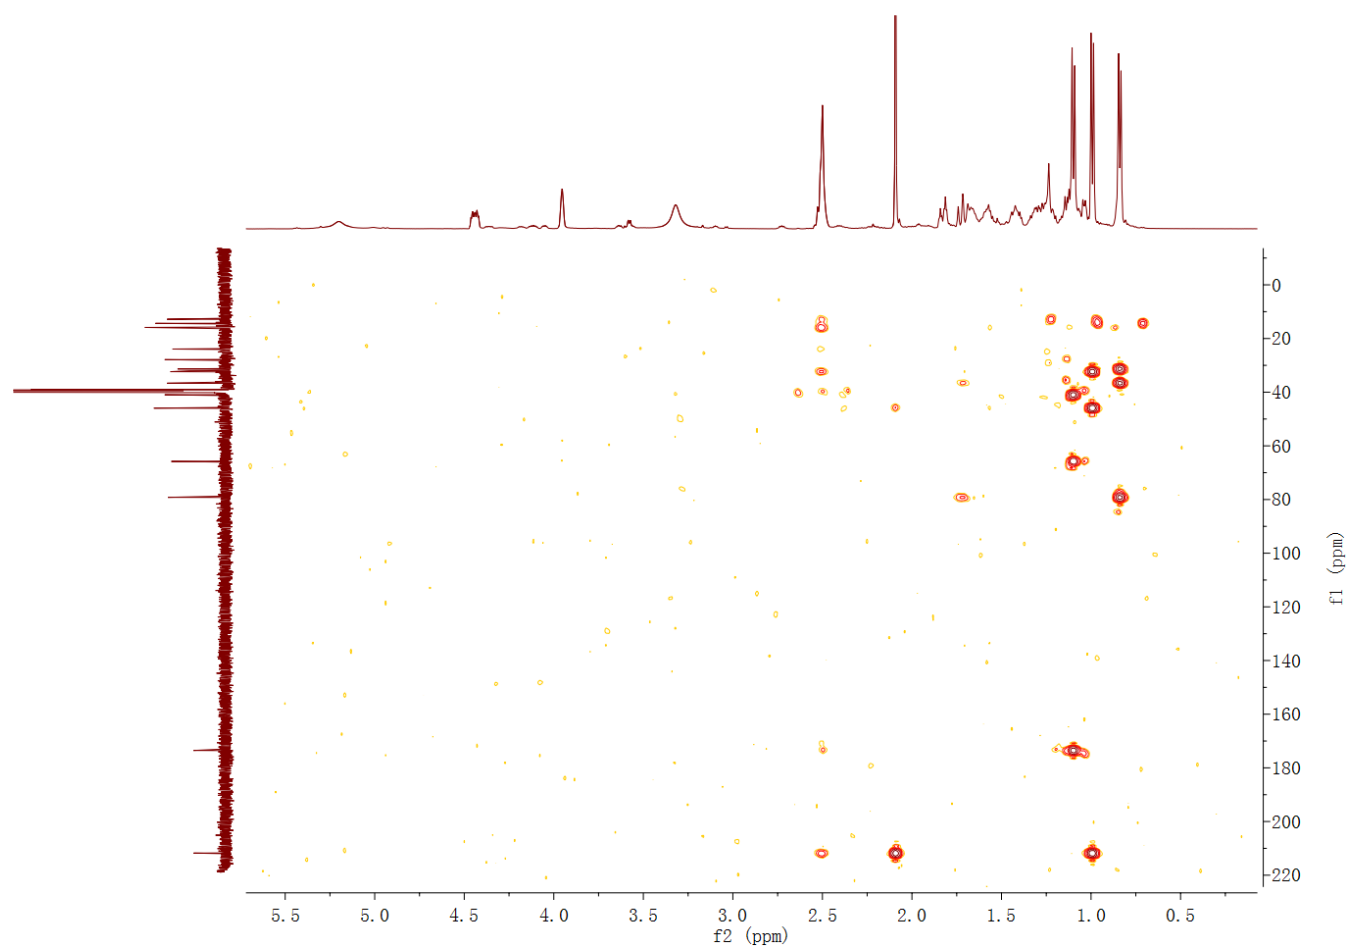

Figure S6. NOESY spectrum of compound **1**.

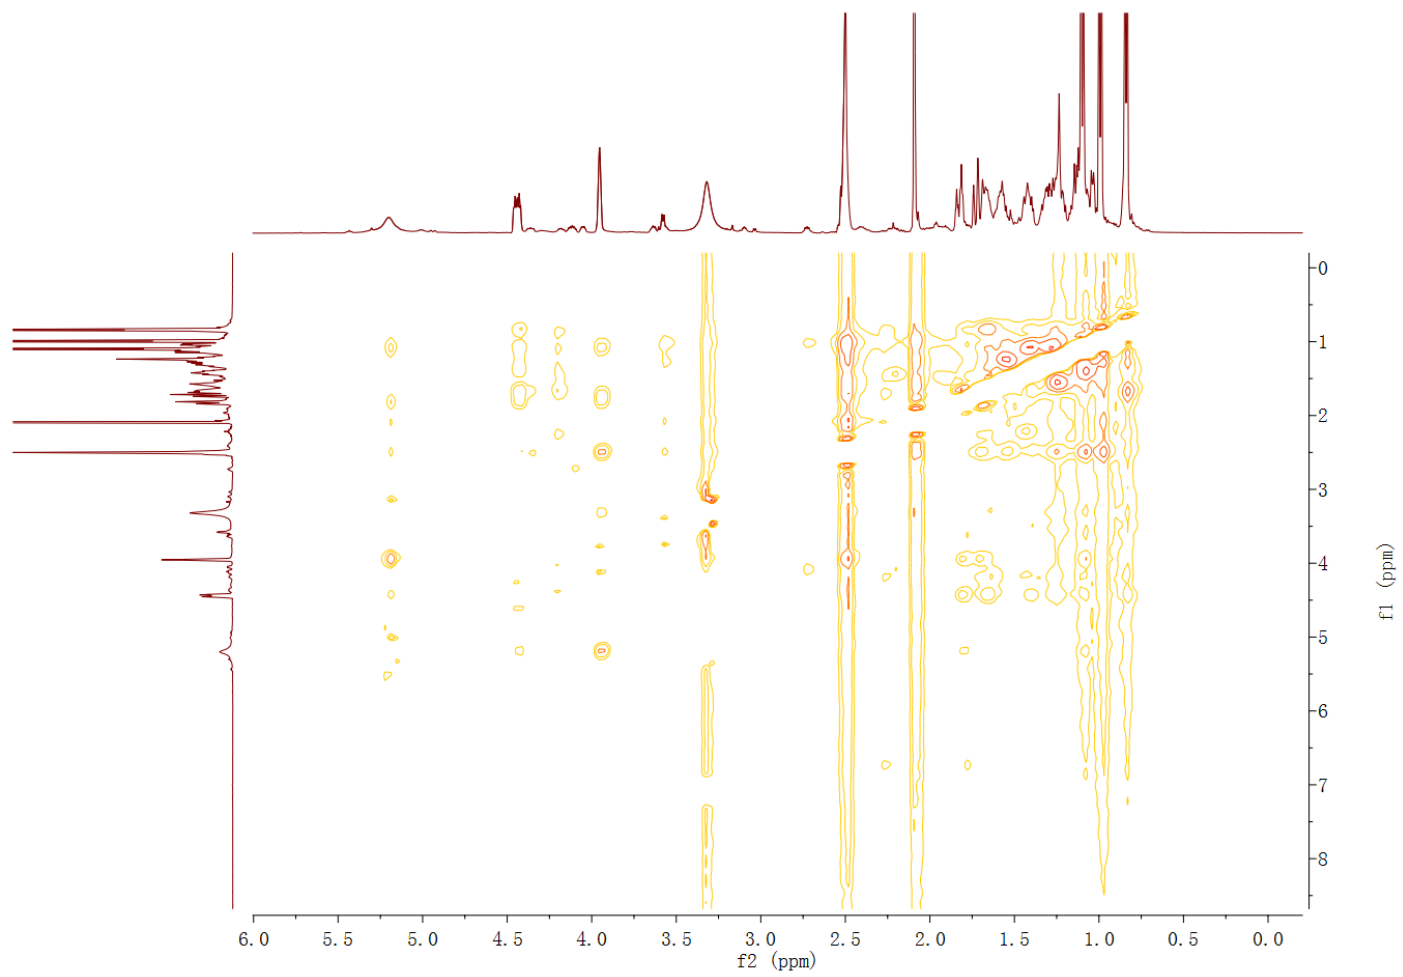

Figure S7. <sup>1</sup>H NMR (500 MHz, DMSO-*d*<sub>6</sub>) spectrum of compound **2**.

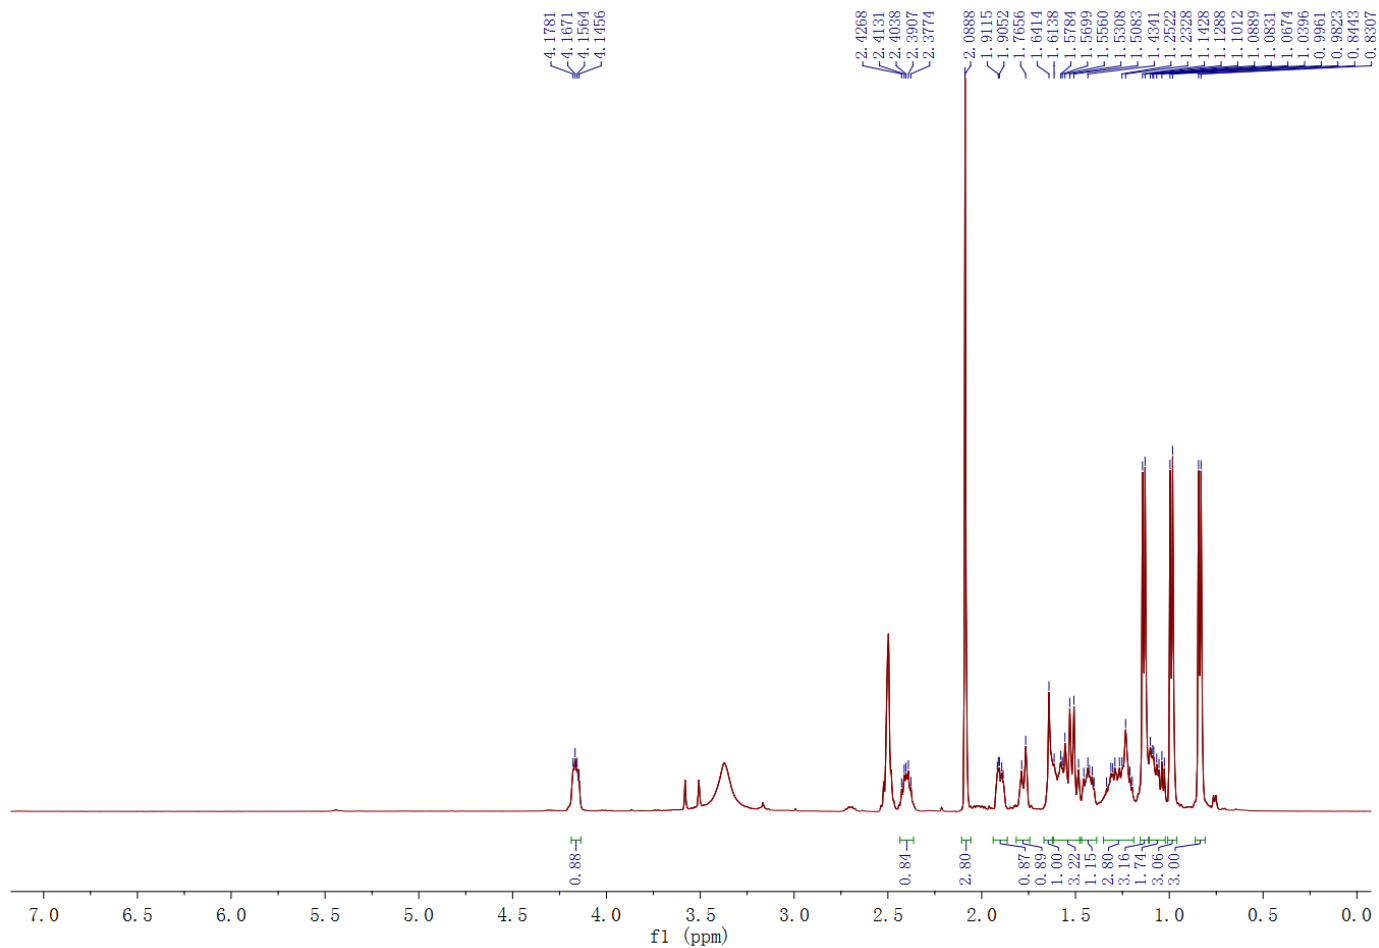



Figure S8.  $^{13}\text{C}$  NMR (125 MHz,  $\text{DMSO-}d_6$ ) and DEPT spectra of compound **2**.

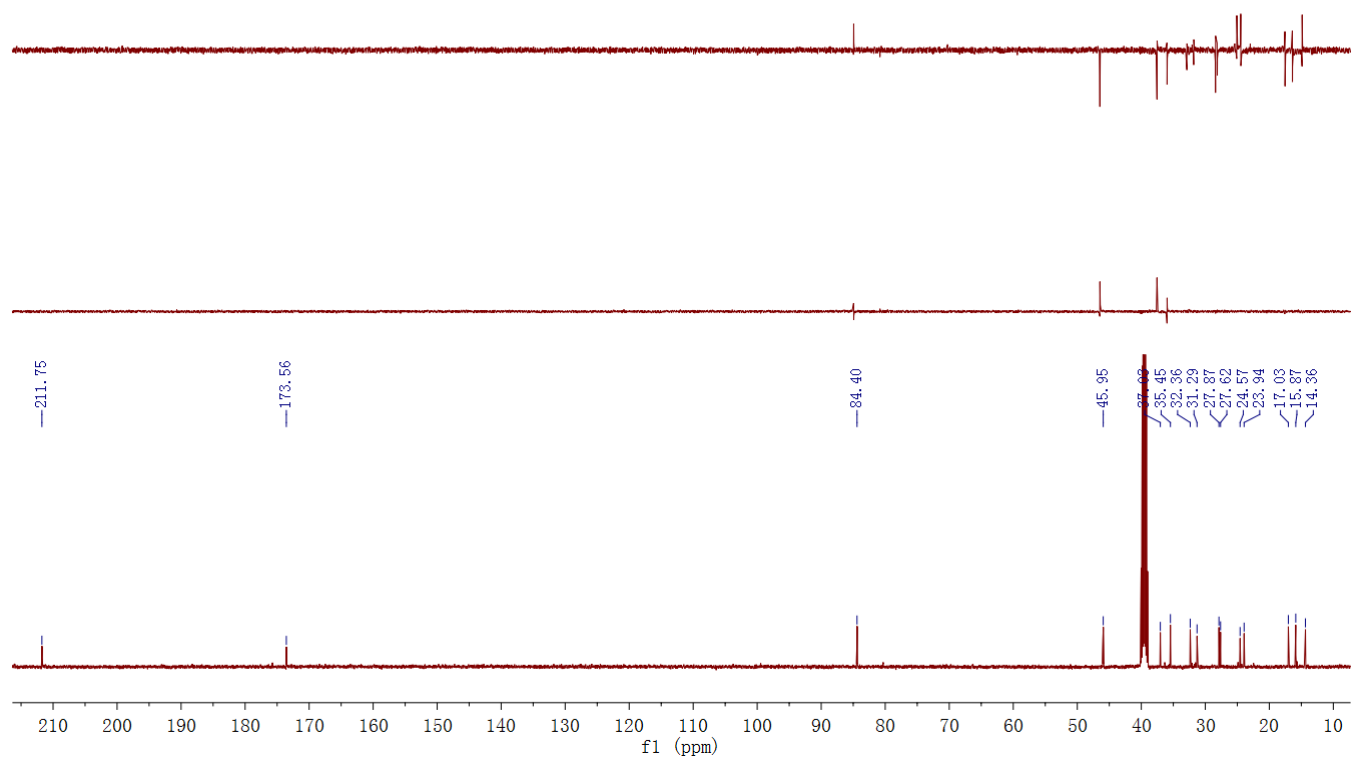

Figure S9. COSY spectrum of compound 2.

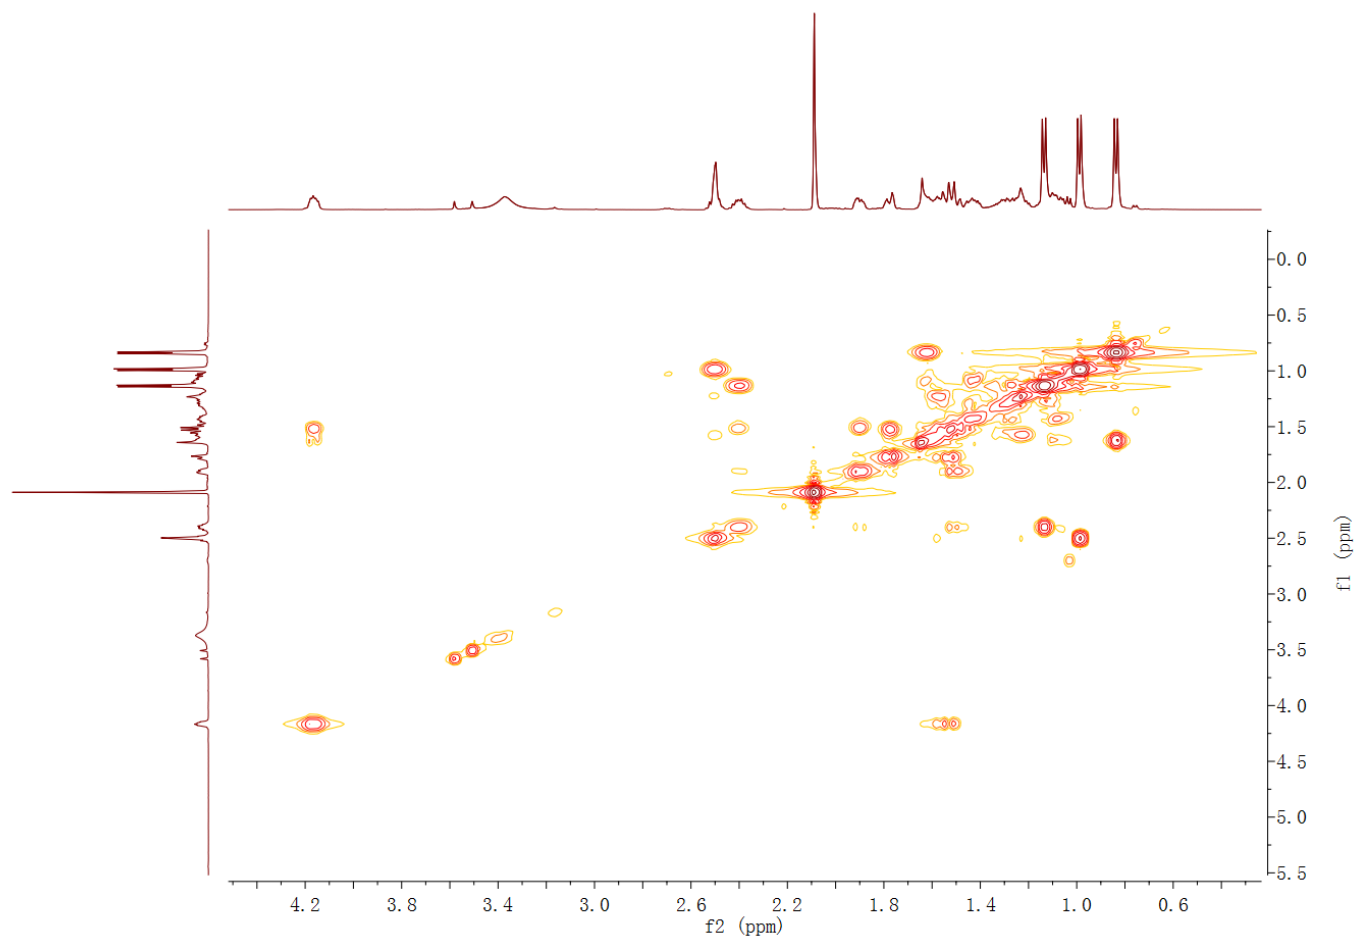

Figure S10. HMBC spectrum of compound 2.

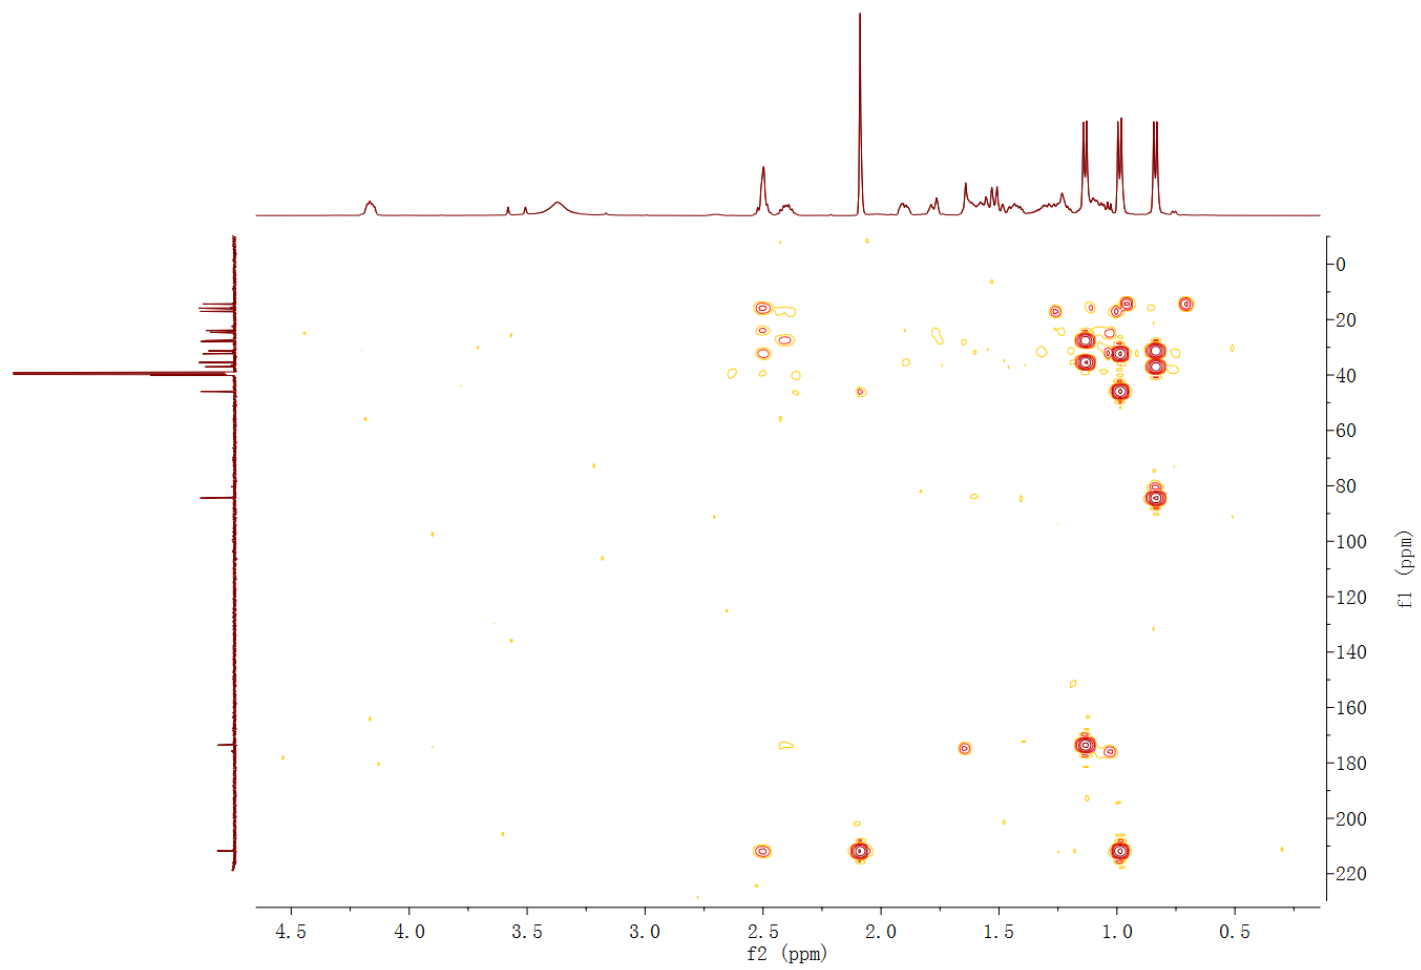

Figure S11. NOESY spectrum of compound 2.

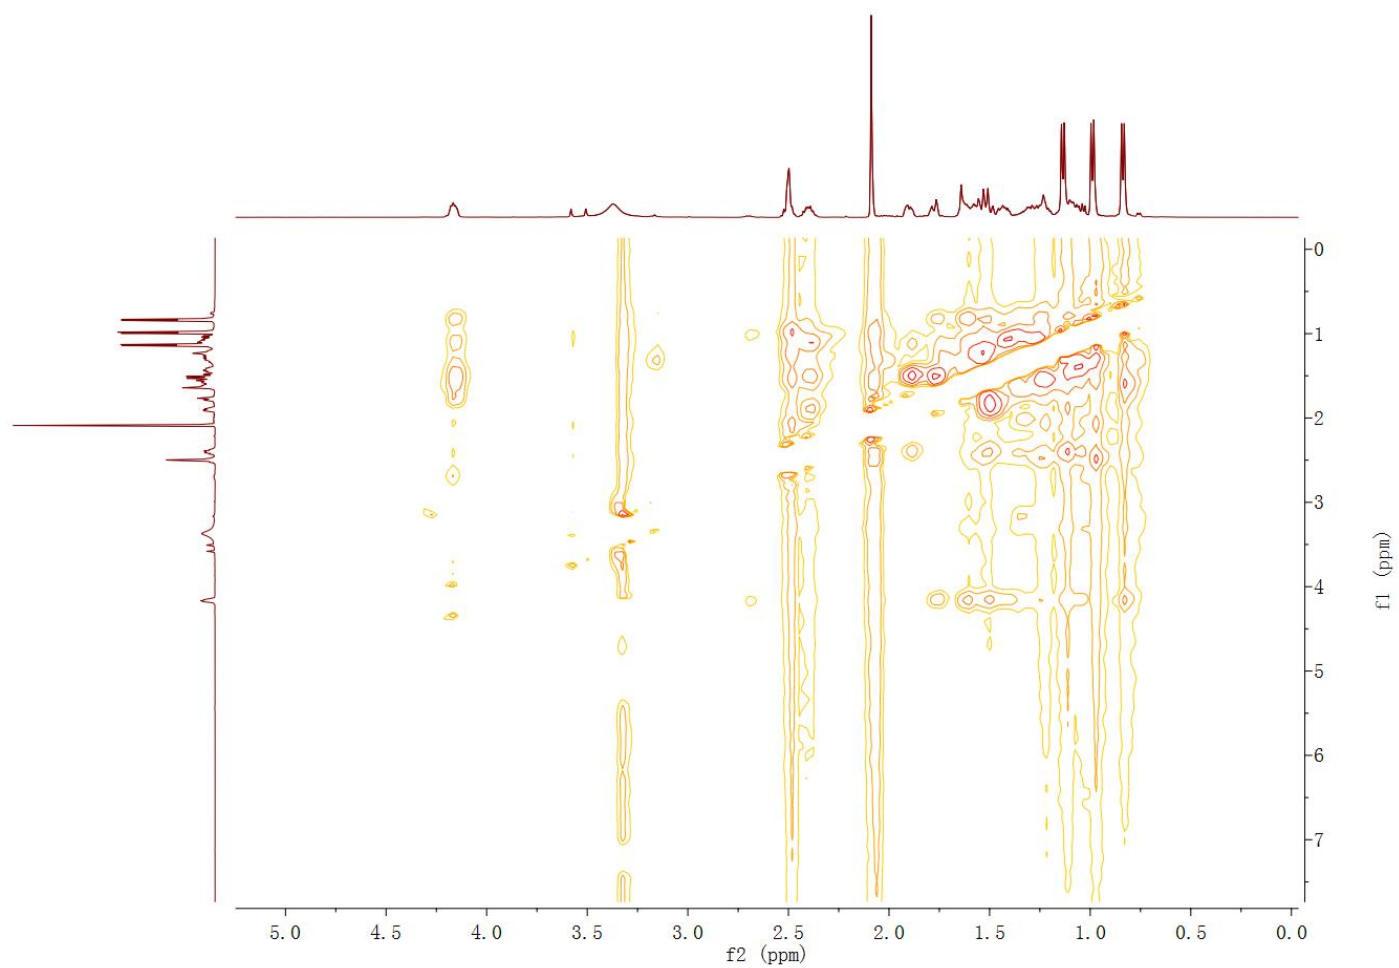

Figure S12. <sup>1</sup>H NMR (500 MHz, DMSO-*d*<sub>6</sub>) spectrum of compound 3.

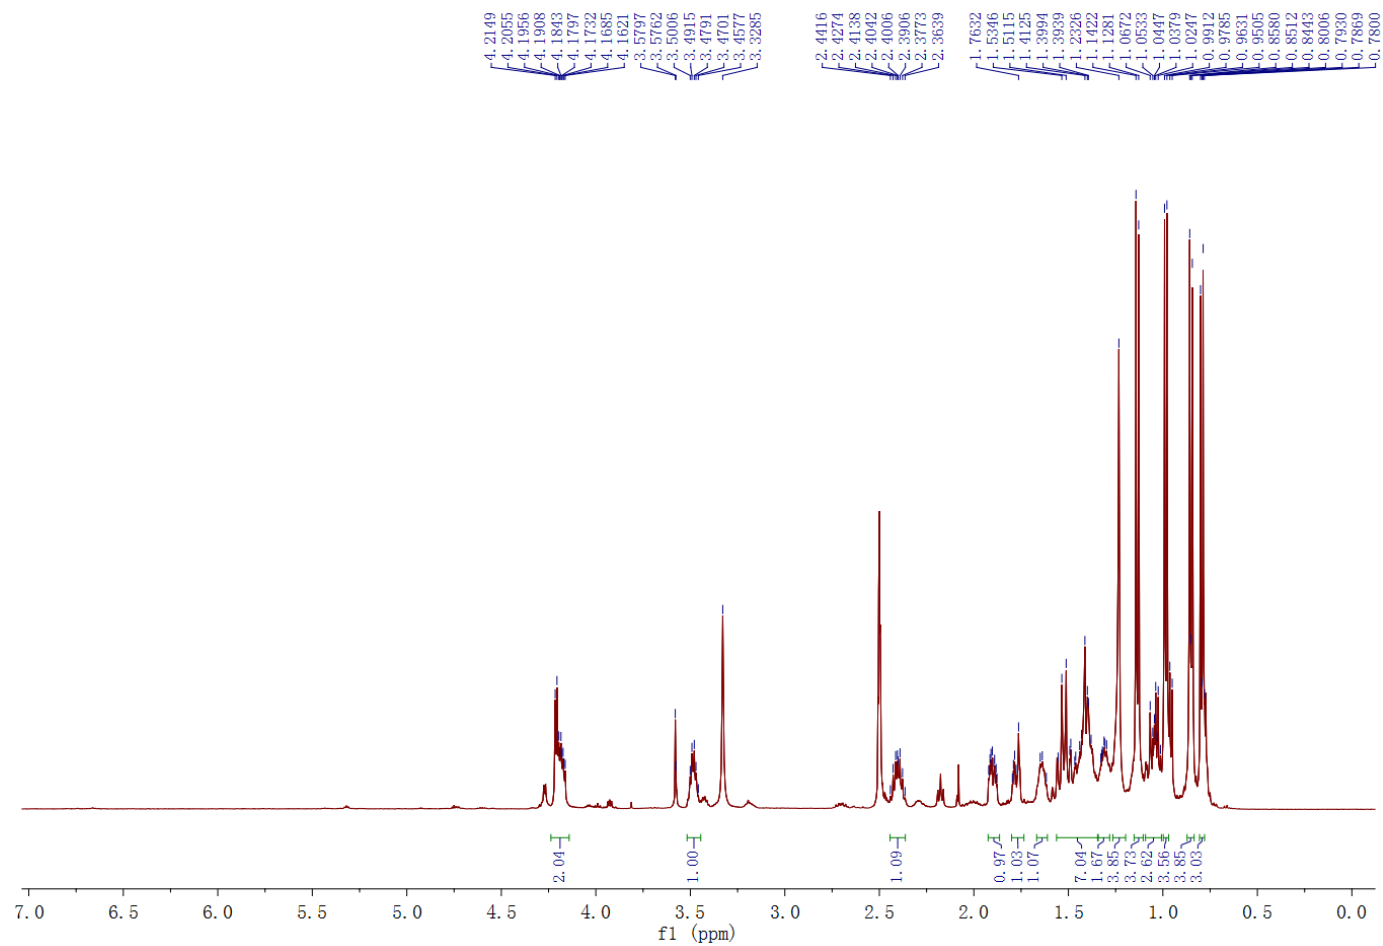

Figure S13.  $^{13}\text{C}$  NMR (125 MHz,  $\text{DMSO-}d_6$ ) and DEPT spectra of compound 3.

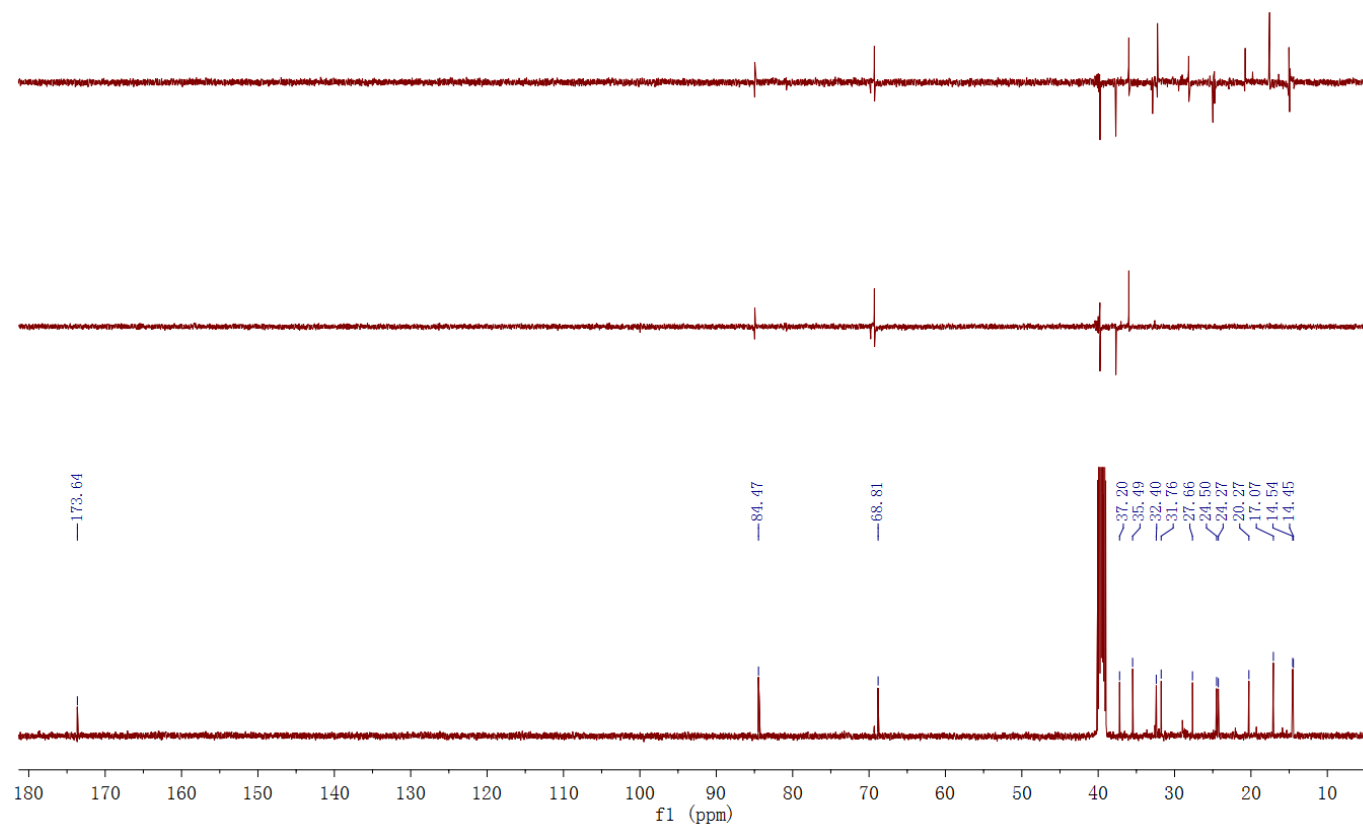

Figure S14. COSY spectrum of compound 3.

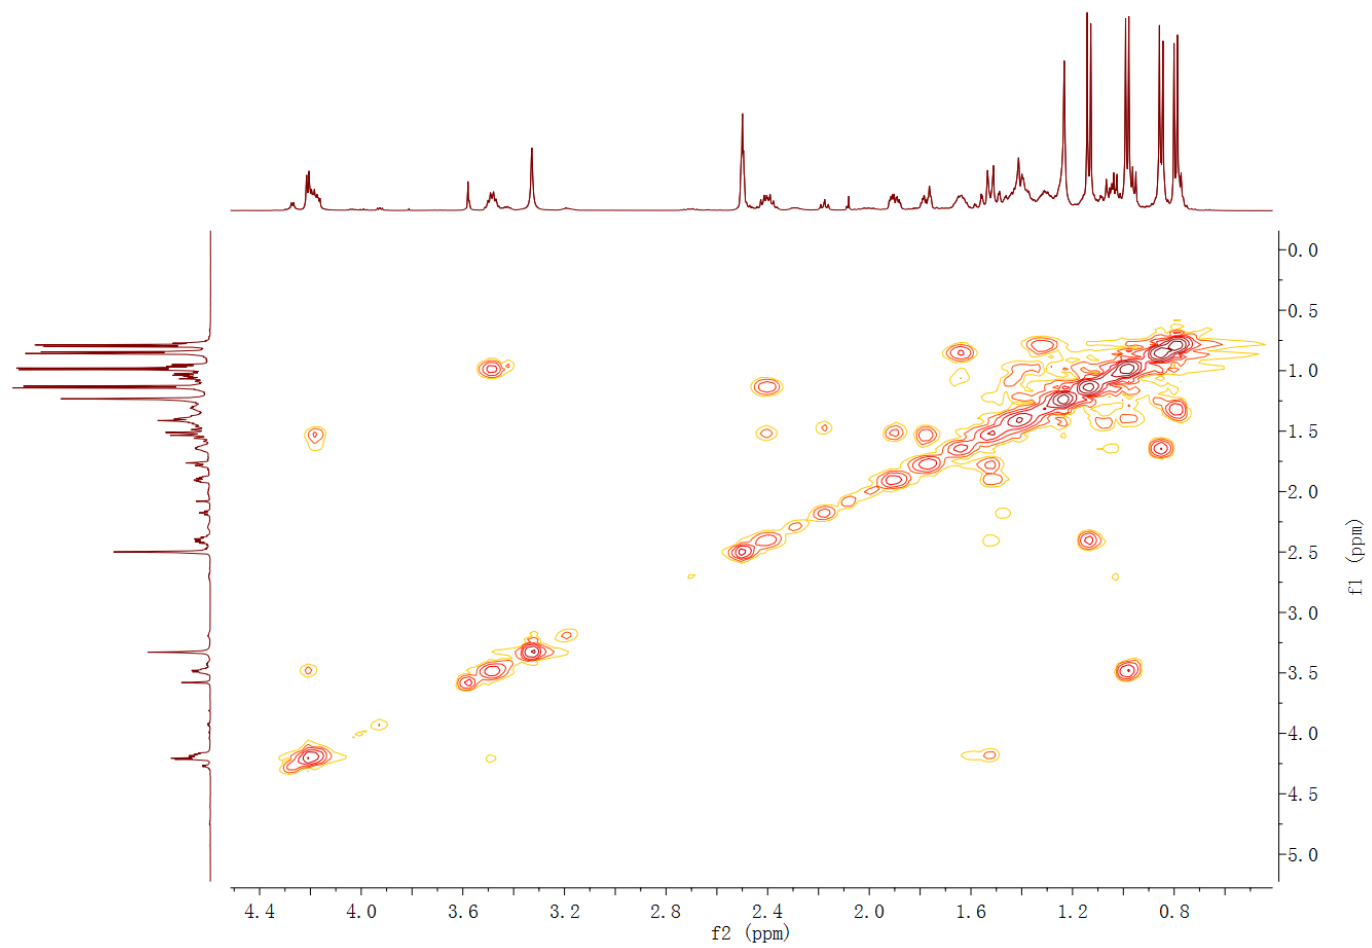

Figure S15. HMBC spectrum of compound 3.

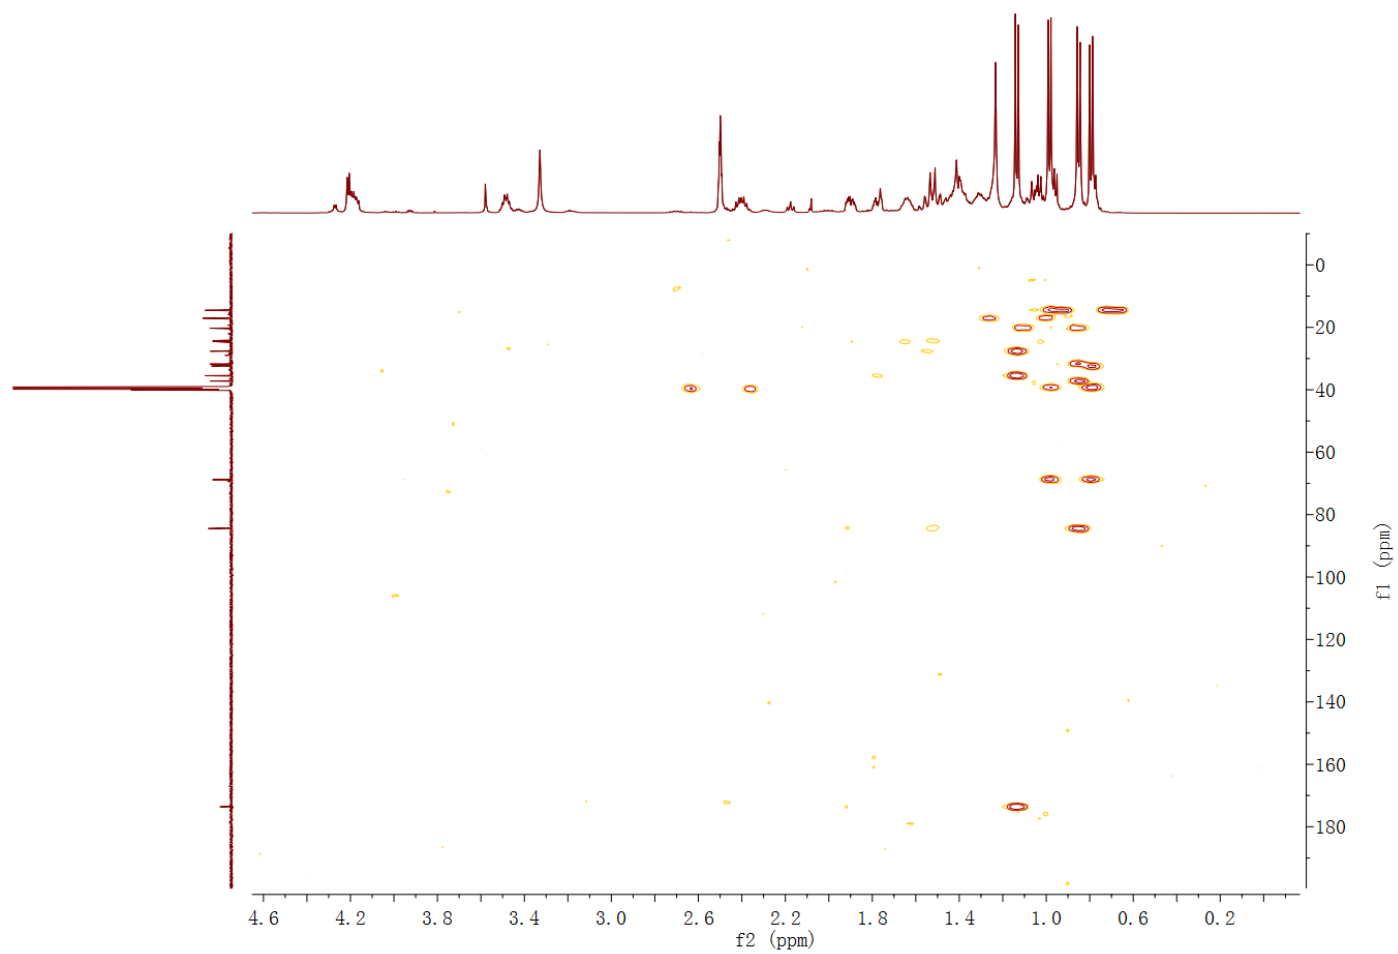



Figure S16. NOESY spectrum of compound 3.

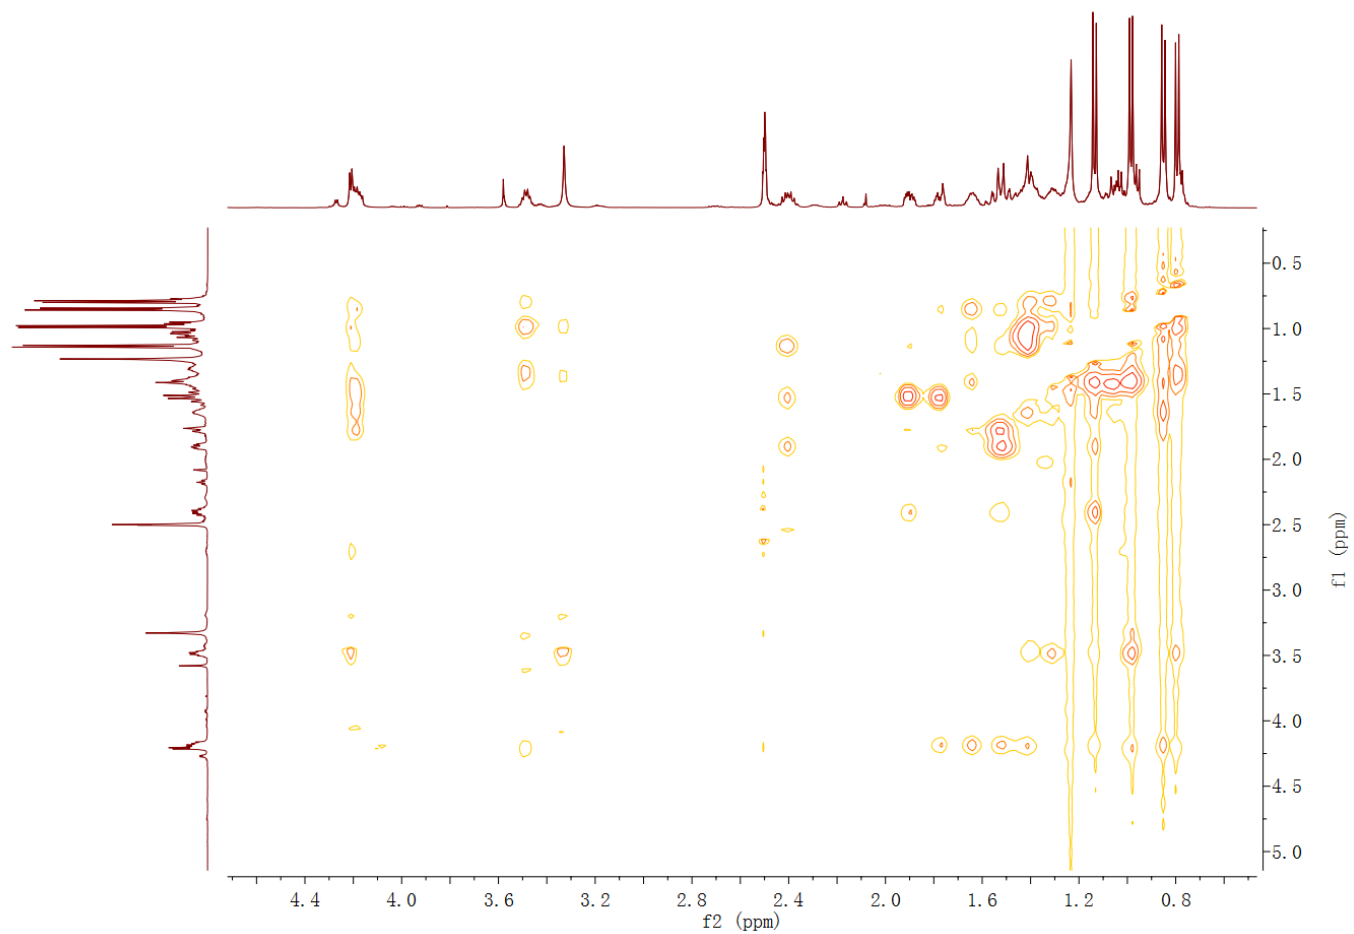

Figure S17. DP4+ probability Excel sheets of compound 1.

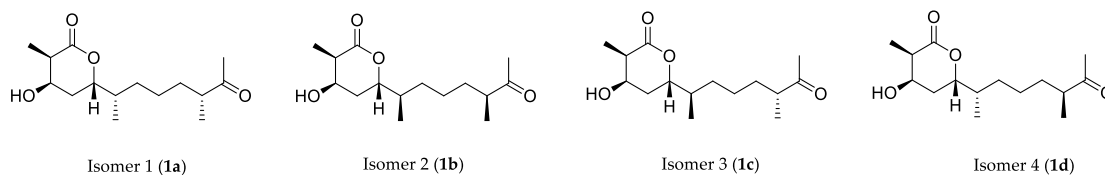

|    | A                 | B           | C                 | D               | E                | F               | G                   | H               |
|----|-------------------|-------------|-------------------|-----------------|------------------|-----------------|---------------------|-----------------|
| 1  | <b>Functional</b> |             | <b>Solvent?</b>   |                 | <b>Basis Set</b> |                 | <b>Type of Data</b> |                 |
| 2  | mPW1PW91          |             | PCM               |                 | 6-31+G(d,p)      |                 | Unscaled Shifts     |                 |
| 3  |                   |             |                   |                 |                  |                 |                     |                 |
| 12 |                   |             | <b>DP4+</b>       | <b>0.00%</b>    | <b>0.00%</b>     | <b>0.90%</b>    | <b>99.10%</b>       | -               |
| 14 | <b>Nuclei</b>     | <b>sp2?</b> | <b>xperimenta</b> | <b>Isomer 1</b> | <b>Isomer 2</b>  | <b>Isomer 3</b> | <b>Isomer 4</b>     | <b>Isomer 5</b> |
| 15 | C                 | x           | 173.50            | 153.95127       | 137.9            | 149.33536       | 158.059             |                 |
| 16 | C                 |             | 41.00             | 32.233057       | 28.5             | 31.128696       | 32.5385             |                 |
| 17 | C                 |             | 65.80             | 57.033378       | 51.0             | 55.46348        | 58.5199             |                 |
| 18 | C                 |             | 23.90             | 22.626703       | 17.6             | 17.433844       | 24.3992             |                 |
| 19 | C                 |             | 79.20             | 64.449366       | 56.0             | 60.448952       | 66.8474             |                 |
| 20 | C                 |             | 36.70             | 25.560948       | 22.8             | 23.386942       | 26.9897             |                 |
| 21 | C                 |             | 31.30             | 17.038785       | 18.4             | 18.39028        | 20.2375             |                 |
| 22 | C                 |             | 32.00             | 7.463994        | 10.8             | 11.586476       | 8.9387              |                 |
| 23 | C                 |             | 32.40             | 22.291527       | 18.5             | 20.897884       | 21.6212             |                 |
| 24 | C                 |             | 46.00             | 35.251684       | 30.3             | 33.931148       | 35.601              |                 |
| 25 | C                 | x           | 211.80            | 197.36838       | 175.3            | 190.34108       | 201.442             |                 |
| 26 | C                 |             | 27.90             | 12.338559       | 15.31            | 12.590458       | 17.9286             |                 |
| 27 | C                 |             | 12.80             | 1.420422        | 1.08             | 1.438462        | 1.3618              |                 |
| 28 | C                 |             | 14.40             | 2.662186        | 1.77             | 1.897212        | 3.4039              |                 |
| 29 | C                 |             | 15.90             | 5.43217         | 6.00             | 5.417534        | 7.142               |                 |
| 30 |                   |             |                   |                 |                  |                 |                     |                 |
| 31 | H                 |             | 2.52              | 2.617065        | 2.33             | 2.5351          | 2.6573              |                 |
| 32 | H                 |             | 3.95              | 4.125029        | 3.66             | 4.017828        | 4.2262              |                 |
| 33 | H                 |             | 1.73              | 2.976471        | 1.91             | 2.466662        | 2.369               |                 |
| 34 | H                 |             | 1.82              | 1.670472        | 1.62             | 1.764934        | 1.7965              |                 |
| 35 | H                 |             | 4.44              | 4.253821        | 3.99             | 4.492554        | 4.3815              |                 |
| 36 | H                 |             | 1.68              | 1.999574        | 1.95             | 2.181596        | 2.0009              |                 |
| 37 | H                 |             | 1.14              | 1.456267        | 1.28             | 1.779472        | 1.6536              |                 |
| 38 | H                 |             | 1.14              | 2.08251         | 1.62             | 1.434424        | 1.8054              |                 |
| 39 | H                 |             | 1.26              | 1.69158         | 1.26             | 1.279544        | 1.5095              |                 |
| 40 | H                 |             | 1.26              | 1.007941        | 1.128711         | 1.466634        | 1.0731              |                 |
| 41 | H                 |             | 1.14              | 2.087465        | 1.804595         | 1.967878        | 1.941               |                 |
| 42 | H                 |             | 1.55              | 1.567643        | 1.181885         | 1.745064        | 1.3687              |                 |
| 43 | H                 |             | 2.52              | 2.784747        | 2.771949         | 2.718346        | 3.144               |                 |
| 44 | H                 |             | 2.09              | 2.399196        | 2.264319         | 2.3263          | 2.5478              |                 |
| 45 | H                 |             | 1.10              | 1.673229        | 1.469468         | 1.617338        | 1.6845              |                 |
| 46 | H                 |             | 0.84              | 1.354612        | 1.044125         | 1.13101         | 1.4121              |                 |
| 47 | H                 |             | 0.98              | 4.194075        | 1.217849         | 1.366996        | 1.4019              |                 |
| 48 |                   |             |                   |                 |                  |                 |                     |                 |
| 49 |                   |             |                   |                 |                  |                 |                     |                 |
| 50 |                   |             |                   |                 |                  |                 |                     |                 |

Figure S18. DP4+ probability Excel sheets of compound 2.

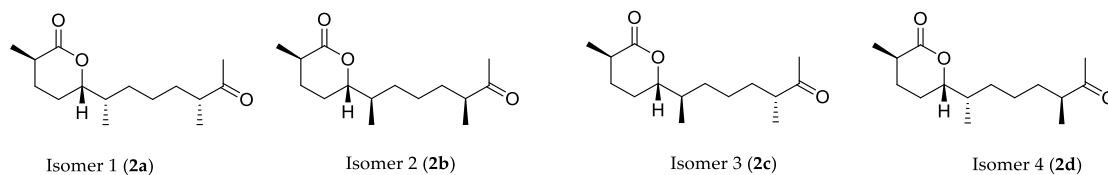

|    | A                 | B           | C                   | D               | E                | F               | G                   | H               |
|----|-------------------|-------------|---------------------|-----------------|------------------|-----------------|---------------------|-----------------|
| 1  | <b>Functional</b> |             | <b>Solvent?</b>     |                 | <b>Basis Set</b> |                 | <b>Type of Data</b> |                 |
| 2  | mPW1PW91          |             | PCM                 |                 | 6-31+G(d,p)      |                 | Shielding Tensors   |                 |
| 3  |                   |             |                     |                 |                  |                 |                     |                 |
| 12 |                   |             | <b>DP4+</b>         | <b>100.00%</b>  | <b>0.00%</b>     | <b>0.00%</b>    | <b>0.00%</b>        | -               |
| 14 | <b>Nuclei</b>     | <b>sp2?</b> | <b>Experimental</b> | <b>Isomer 1</b> | <b>Isomer 2</b>  | <b>Isomer 3</b> | <b>Isomer 4</b>     | <b>Isomer 5</b> |
| 15 | C                 | x           | 173.56              | 24.1242         | 23.011959        | 23.60158        | 22.691946           |                 |
| 16 | C                 |             | 35.45               | 156.298         | 155.23803        | 154.65154       | 154.88628           |                 |
| 17 | C                 |             | 27.87               | 165.233         | 163.47447        | 163.57321       | 162.89739           |                 |
| 18 | C                 |             | 27.62               | 172.212         | 164.67126        | 165.96687       | 157.15527           |                 |
| 19 | C                 |             | 84.40               | 108.86          | 111.07848        | 109.37328       | 114.57903           |                 |
| 20 | C                 |             | 37.03               | 155.547         | 153.6294         | 155.92468       | 157.61283           |                 |
| 21 | C                 |             | 31.29               | 160.452         | 158.559762       | 160.73202       | 160.84836           |                 |
| 22 | C                 |             | 24.57               | 166.418         | 173.01048        | 168.78019       | 167.93736           |                 |
| 23 | C                 |             | 32.36               | 159.953         | 160.218          | 159.10895       | 162.05187           |                 |
| 24 | C                 |             | 45.95               | 146.784         | 148.26333        | 145.04588       | 145.89546           |                 |
| 25 | C                 | x           | 211.75              | -20.1235        | -19.693377       | -19.56505       | -19.370673          |                 |
| 26 | C                 |             | 23.94               | 163.818         | 163.3017         | 162.34056       | 162.59898           |                 |
| 27 | C                 |             | 17.03               | 177.838         | 176.19966        | 175.88769       | 175.96035           |                 |
| 28 | C                 |             | 14.36               | 176.786         | 178.31226        | 172.74894       | 178.87335           |                 |
| 29 | C                 |             | 15.87               | 175.901         | 173.33928        | 173.89608       | 173.58252           |                 |
| 30 |                   |             |                     |                 |                  |                 |                     |                 |
| 31 | H                 |             | 2.4                 | 29.2261         | 28.845987        | 28.882677       | 28.82664            |                 |
| 32 | H                 |             | 1.9                 | 30.0046         | 29.683317        | 29.67089        | 29.488662           |                 |
| 33 | H                 |             | 1.56                | 29.6206         | 29.35143         | 29.313048       | 29.269023           |                 |
| 34 | H                 |             | 1.78                | 29.8232         | 29.347659        | 29.621675       | 29.631207           |                 |
| 35 | H                 |             | 1.57                | 29.9074         | 29.756562        | 29.449015       | 29.267028           |                 |
| 36 | H                 |             | 4.17                | 27.1408         | 27.080199        | 26.775889       | 26.573841           |                 |
| 37 | H                 |             | 1.64                | 29.5896         | 29.469129        | 29.416547       | 29.428302           |                 |
| 38 | H                 |             | 1.08                | 30.3558         | 29.060325        | 30.011322       | 29.643042           |                 |
| 39 | H                 |             | 1.08                | 30.169          | 30.264225        | 29.568942       | 30.025413           |                 |
| 40 | H                 |             | 1.27                | 30.5775         | 30.229719        | 29.999067       | 30.031506           |                 |
| 41 | H                 |             | 1.27                | 29.8764         | 29.981016        | 30.304288       | 30.046134           |                 |
| 42 | H                 |             | 1.23                | 30.5435         | 29.237664        | 30.270589       | 29.341563           |                 |
| 43 | H                 |             | 1.55                | 30.4289         | 30.302715        | 29.542875       | 30.294108           |                 |
| 44 | H                 |             | 2.5                 | 28.79           | 28.143639        | 28.477487       | 28.455996           |                 |
| 45 | H                 |             | 2.09                | 29.383          | 28.786152        | 29.069633       | 29.033268           |                 |
| 46 | H                 |             | 1.14                | 30.374          | 30.072564        | 30.049355       | 30.021528           |                 |
| 47 | H                 |             | 0.84                | 30.6448         | 30.367866        | 30.182853       | 30.367578           |                 |
| 48 | H                 |             | 0.99                | 30.5123         | 30.202833        | 30.222871       | 30.239934           |                 |
| 49 |                   |             |                     |                 |                  |                 |                     |                 |
| 50 |                   |             |                     |                 |                  |                 |                     |                 |

Figure S19. DP4+ probability Excel sheets of compound 3.

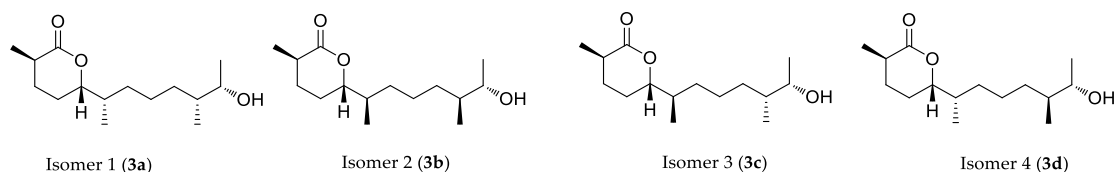

|    | A                 | B           | C                 | D               | E                | F               | G                   | H               |
|----|-------------------|-------------|-------------------|-----------------|------------------|-----------------|---------------------|-----------------|
| 1  | <b>Functional</b> |             | <b>Solvent?</b>   |                 | <b>Basis Set</b> |                 | <b>Type of Data</b> |                 |
| 2  | nPV1PW91          |             | PCM               |                 | 6-31+G(d,p)      |                 | Unscaled Shifts     |                 |
| 3  |                   |             |                   |                 |                  |                 |                     |                 |
| 12 |                   |             | <b>DP4+</b>       | <b>0.00%</b>    | <b>0.00%</b>     | <b>100.00%</b>  | <b>0.00%</b>        | -               |
| 14 | <b>Nuclei</b>     | <b>sp2?</b> | <b>xperimenta</b> | <b>Isomer 1</b> | <b>Isomer 2</b>  | <b>Isomer 3</b> | <b>Isomer 4</b>     | <b>Isomer 5</b> |
| 15 | C                 | x           | 173.6             | 21.58           | 19.9             | 22.47462564     | 19.444353           |                 |
| 16 | C                 |             | 35.5              | 156.545         | 120.3            | 156.3809744     | 125.45432           |                 |
| 17 | C                 |             | 27.7              | 165.809         | 129.9            | 165.752859      | 134.28391           |                 |
| 18 | C                 |             | 24.5              | 172.322         | 165.9            | 169.9982179     | 164.67292           |                 |
| 19 | C                 |             | 84.5              | 107.328         | 111.0            | 110.5095385     | 110.96522           |                 |
| 20 | C                 |             | 37.2              | 160.138         | 155.2            | 155.933641      | 1064.59344          |                 |
| 21 | C                 |             | 31.8              | 162.037         | 165.0            | 160.6638846     | 161.65297           |                 |
| 22 | C                 |             | 24.3              | 174.669         | 175.3            | 171.8792949     | 172.16078           |                 |
| 23 | C                 |             | 32.4              | 164.561         | 163.8            | 161.6007308     | 161.29671           |                 |
| 24 | C                 |             | 40                | 153.406         | 157.9            | 153.489141      | 156.18003           |                 |
| 25 | C                 |             | 68.8              | 127.373         | 121.4            | 122.9007821     | 119.85295           |                 |
| 26 | C                 |             | 20.3              | 172.519         | 179.88           | 173.0329615     | 178.08411           |                 |
| 27 | C                 |             | 17.1              | 177.447         | 178.52           | 178.0852051     | 176.79942           |                 |
| 28 | C                 |             | 14.5              | 175.539         | 179.82           | 179.9491026     | 178.08615           |                 |
| 29 | C                 |             | 14.5              | 178.984         | 175.62           | 178.303141      | 175.39964           |                 |
| 30 |                   |             |                   |                 |                  |                 |                     |                 |
| 31 | H                 |             | 2.4               | 29.0578         | 29.07            | 29.08405897     | 28.773343           |                 |
| 32 | H                 |             | 1.9               | 29.9963         | 29.87            | 29.96154103     | 29.56458            |                 |
| 33 | H                 |             | 1.53              | 29.5846         | 29.60            | 29.63113718     | 29.272391           |                 |
| 34 | H                 |             | 1.78              | 29.8045         | 29.55            | 29.73214615     | 29.431241           |                 |
| 35 | H                 |             | 1.51              | 29.8008         | 29.94            | 29.96466538     | 29.494816           |                 |
| 36 | H                 |             | 4.17              | 27.0092         | 27.29            | 27.1089359      | 26.925817           |                 |
| 37 | H                 |             | 1.638             | 29.1799         | 29.71            | 29.75250385     | 29.487766           |                 |
| 38 | H                 |             | 1.05              | 30.3459         | 29.27            | 30.03429359     | 29.103964           |                 |
| 39 | H                 |             | 1.05              | 29.7921         | 29.50            | 30.41345897     | 29.388              |                 |
| 40 | H                 |             | 1.4               | 30.3536         | 30.17996         | 29.91086154     | 28.866932           |                 |
| 41 | H                 |             | 1.4               | 30.1884         | 30.24424         | 30.33316538     | 30.026083           |                 |
| 42 | H                 |             | 1.03              | 28.8998         | 29.94076         | 30.10935641     | 29.497017           |                 |
| 43 | H                 |             | 0.96              | 30.6552         | 30.48782         | 29.98940256     | 30.320824           |                 |
| 44 | H                 |             | 1.31              | 30.1045         | 29.44944         | 30.09032692     | 29.159755           |                 |
| 45 | H                 |             | 3.49              | 28.0405         | 27.58348         | 28.14976538     | 27.280718           |                 |
| 46 | H                 |             | 0.97              | 30.523          | 30.5468          | 30.38819872     | 30.209437           |                 |
| 47 | H                 |             | 1.14              | 30.3169         | 30.40494         | 30.26057051     | 30.099258           |                 |
| 48 | H                 |             | 0.85              | 30.6811         | 30.60436         | 30.70603077     | 30.306998           |                 |
| 49 | H                 |             | 0.79              | 30.7608         | 30.8007          | 30.76496282     | 30.504367           |                 |
| 50 |                   |             |                   |                 |                  |                 |                     |                 |
